# Supplementary material for: The Influence of Cellulose Nanocrystal Characteristics on Regenerative Silk Composite Fiber Properties
Source: Materials (Basel). 2023 Mar 14;16(6):2323. doi: 10.3390/ma16062323 (PMC10052345; doi:10.3390/ma16062323)
Supplement: Supplementary file 1 [file materials-16-02323-s001.zip › materials-2250736-supplementary.pdf]

## **Supplementary Materials**

# **Influence of Cellulose Nanocrystal Characteristics on Regenerative Silk Composite Fiber Properties**

**Hak Jeon Kim <sup>1</sup>, and Won Jun Lee <sup>1,\*</sup>**

<sup>1</sup> Department of Fiber System Engineering, Dankook University, Yongin, 16890, Republic of Korea  
\* Correspondence: [wjlee@dankook.ac.kr](mailto:wjlee@dankook.ac.kr) Tel.: +82-31-8005-3563

**Table S1.** Representative various CNCs used in this study.

|           | FCNC       | MCNC       | LCNC         |
|-----------|------------|------------|--------------|
| Country   | Canada     | U.S.A.     | Canada       |
| Suppliers | CelluForce | Maine Univ | CelluloseLab |

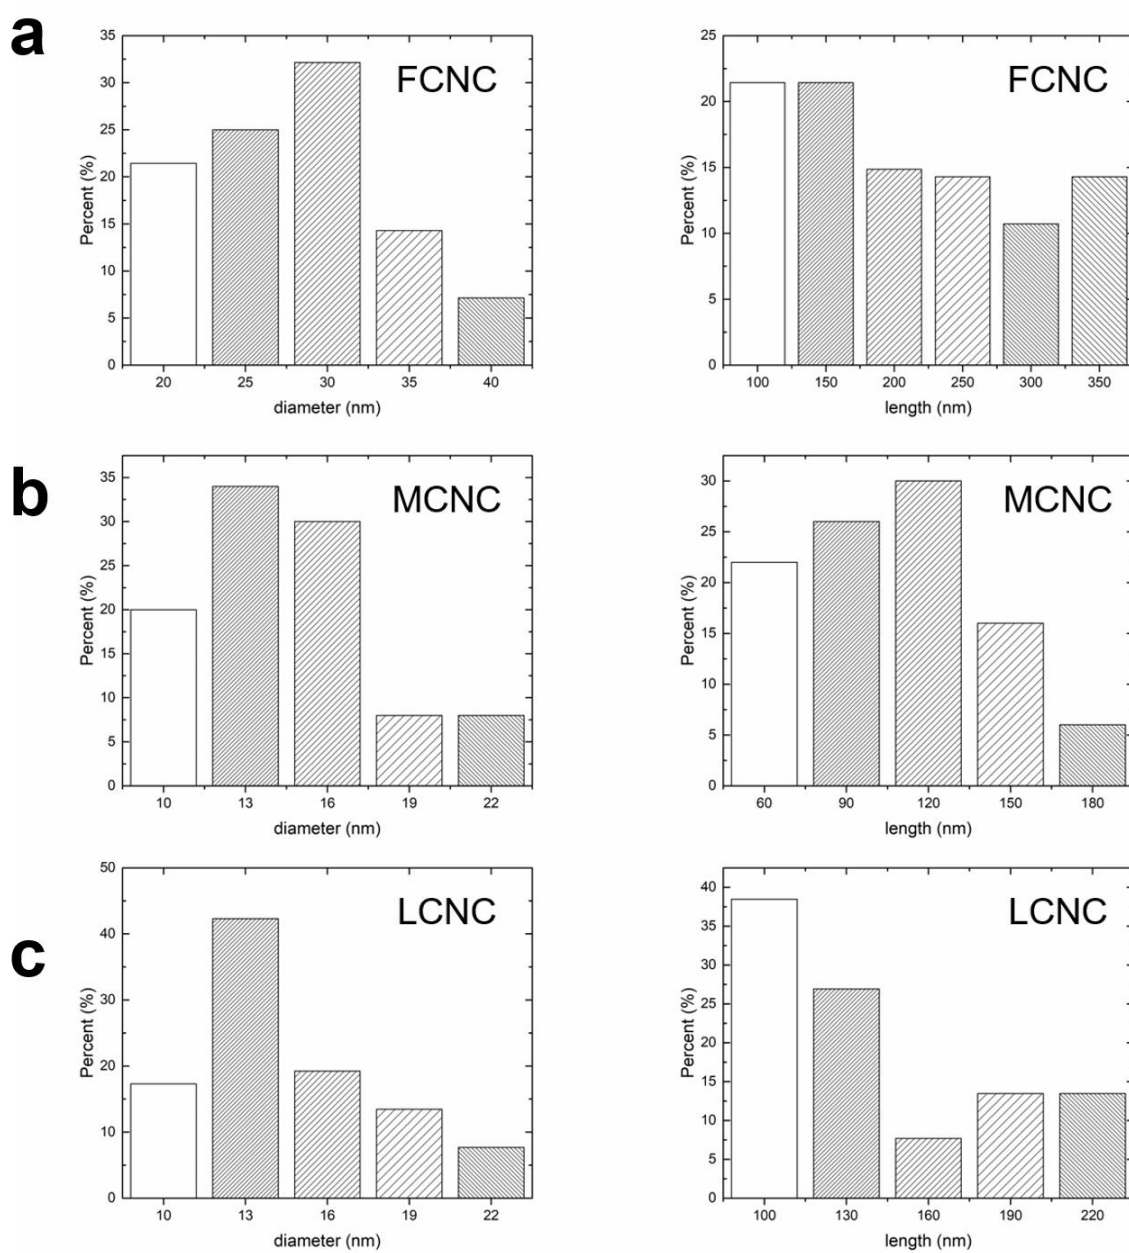

**Figure S1.** Diameter and length histograms of various CNCs

**a**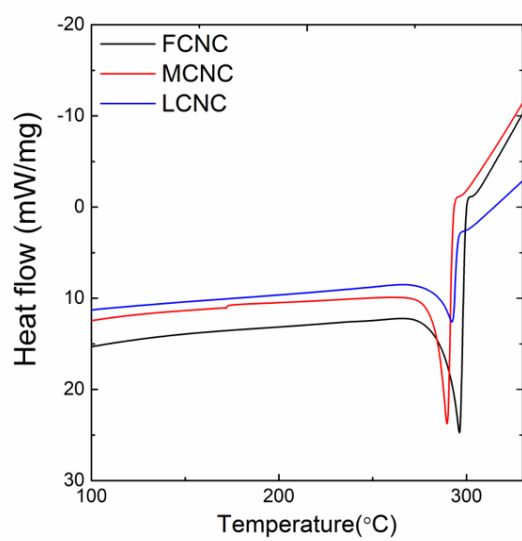**b**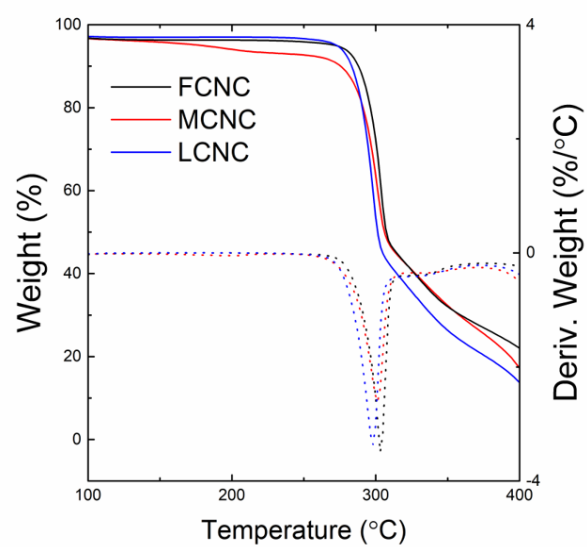

**Figure S2.** Thermal stability and thermograms of various CNCs.

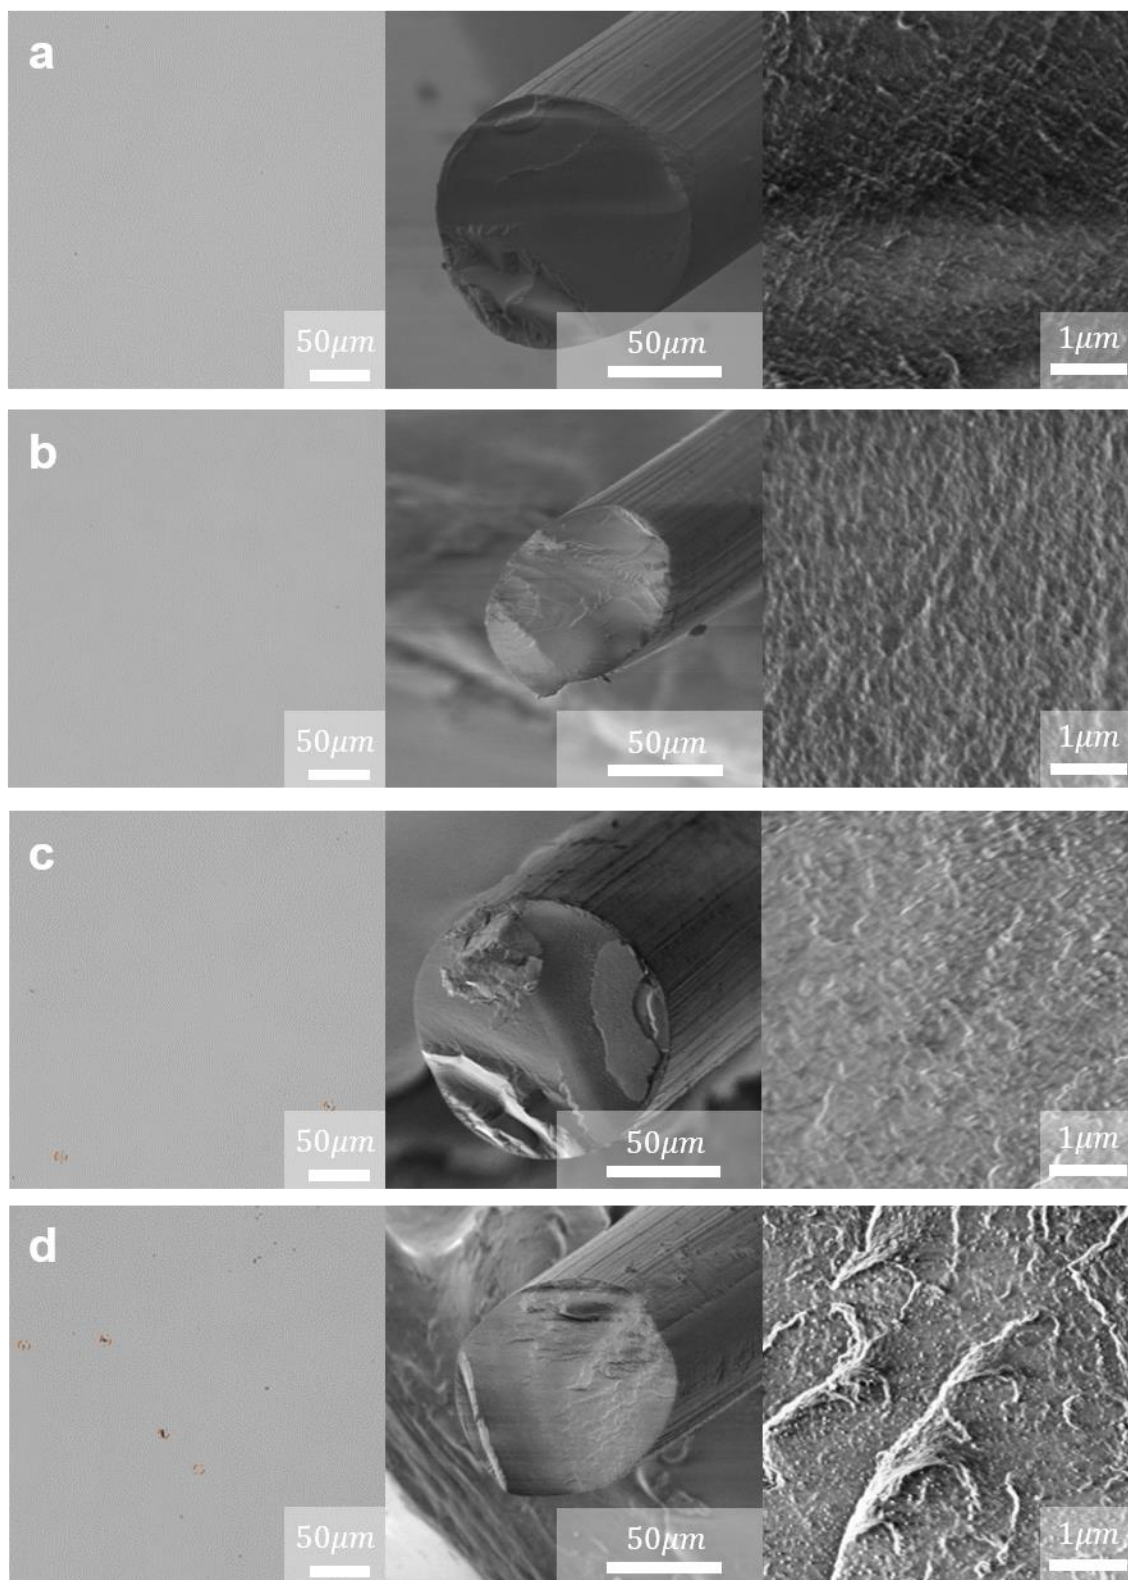

**Figure S3.** The dope solution and cross-sectional images of composite fiber with different volume fractions of CNCs : a) control, b) vol 1%, c) vol 2%, and d) vol 5%.

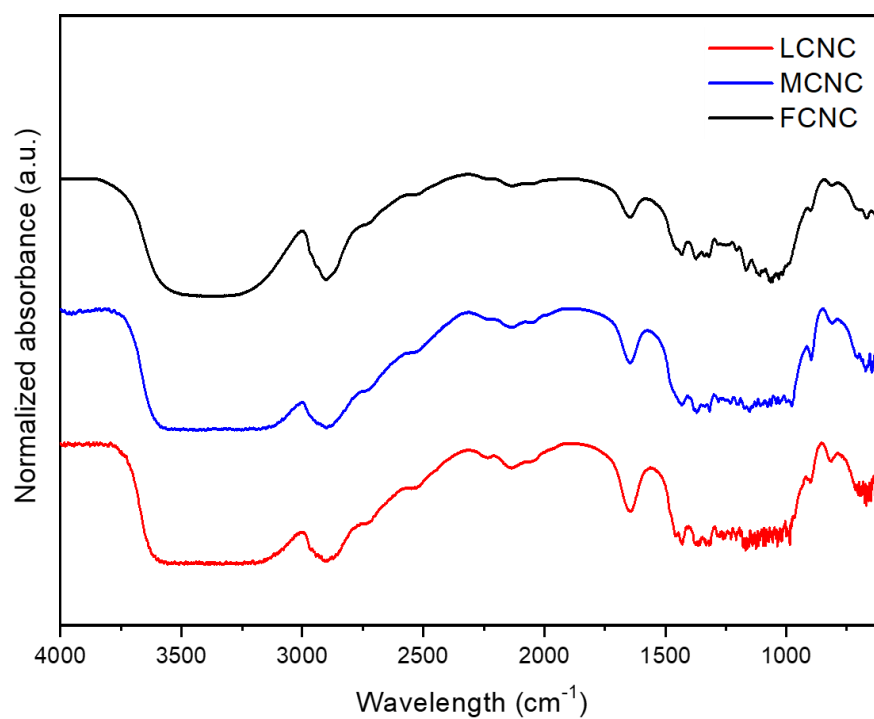

**Figure S4.** FT-IR spectra of various CNCs.

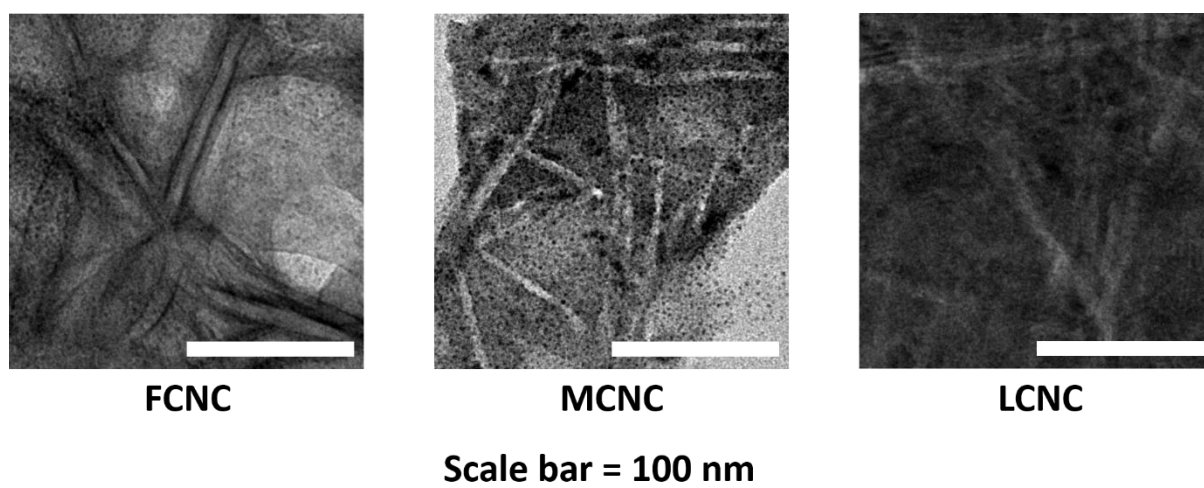

**Figure S5.** TEM images of various CNCs

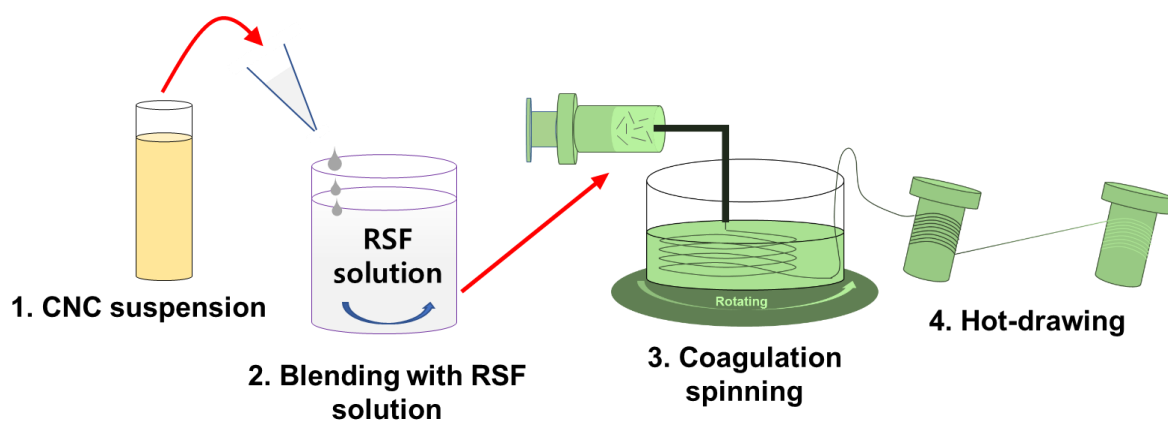

**Figure S6.** Schematic illustration of RSF/CNC composite fiber spinning
